# Supplementary material for: Reversible single-crystal to single-crystal transformations in a Hg(ii) derivative. 1D-polymeric chain ⇌ 2D-networking as a function of temperature
Source: Royal Society of Chemistry journal article supplement (doi:10.1039/c0dt00085j), 2010-01-01
Supplement: c0dt00085j.pdf [file c0dt00085j.pdf]

## Supplementary Information

**Reversible single-crystal to single-crystal transformations in a Hg(II) derivative. 1D-polymeric chain  $\rightleftharpoons$  2D-networking as a function of temperature**

**Shaikh M. Mobin,<sup>a,b,c</sup> Ashwini K. Srivastava,<sup>\*c</sup> Pradeep Mathur,<sup>\*a,b</sup> and Goutam Kumar Lahiri,<sup>\*a,b</sup>**

*<sup>a</sup>National Single Crystal X-ray Diffraction Facility and <sup>b</sup>Department of Chemistry, IIT Bombay, Powai, Mumbai-400076, India*

*<sup>c</sup>Department of Chemistry, University of Mumbai, Vidyanaigari, Mumbai 400098, India*

**Table S1** Selected bond lengths (Å) and angles (°) for **1**, **4** and **1** (Regenerated)

| Bond lengths (Å)    | <b>1</b> (X=Cl) | <b>4</b>   | <b>1</b> (X=Cl)<br><b>(Regenerated)</b> |
|---------------------|-----------------|------------|-----------------------------------------|
| Hg(1)-N(1)          | 2.220(3)        | 2.143(6)   | 2.194(8)                                |
| Hg(1)-X(1)          | 2.3629(10)      | 2.316(2)   | 2.353(3)                                |
| Hg(1)-X(2)#1        |                 | 2.8408(19) |                                         |
| Hg(1)-X(2)          | 2.7858(10)      | 2.885(2)   | 2.777(3)                                |
| Hg(1)-X(3)          | 2.4980(10)      |            | 2.492(3)                                |
| Hg(2)-N(2)          | 2.209(3)        |            | 2.212(8)                                |
| Hg(2)-X(4)          | 2.3798(10)      | 2.3300(18) | 2.365(3)                                |
| Hg(2)-X(3)          | 2.7533(10)      | 2.3512(19) | 2.743(3)                                |
| Hg(2)-X(2)#1        | 2.4987(10)      |            | 2.490(3)                                |
| Hg(2)-X(2)          |                 | 2.756(2)   |                                         |
| Hg(2)-X(3)#2        |                 | 2.8575(19) |                                         |
| Bond angles (°)     |                 |            |                                         |
| N(1)-Hg(1)-X(1)     | 133.93(10)      | 157.48(17) | 133.7(3)                                |
| N(1)-Hg(1)-X(3)     | 105.24(10)      |            | 105.2(3)                                |
| X(1)-Hg(1)-X(3)     | 119.16(4)       |            | 119.56(11)                              |
| N(1)-Hg(1)-X(2)     | 92.59(9)        | 97.00(17)  | 91.8(2)                                 |
| N(1)-Hg(1)-X(2)#1   |                 | 97.47(16)  |                                         |
| X(1)-Hg(1)-X(2)     | 96.43(4)        | 98.59(7)   | 96.59(10)                               |
| X(1)-Hg(1)-X(2)#1   |                 | 101.28(7)  |                                         |
| X(2)#1-Hg(1)-X(2)   |                 | 79.90(6)   |                                         |
| X(3)-Hg(1)-X(2)     | 93.17(3)        |            | 93.40(9)                                |
| N(2)-Hg(2)-X(4)     | 133.48(9)       |            | 133.2(2)                                |
| N(2)-Hg(2)-X(2)#1   | 107.32(9)       |            | 107.4(2)                                |
| X(4)-Hg(2)-X(2)#1   | 116.57(4)       | 94.71(7)   | 116.84(11)                              |
| N(2)-Hg(2)-X(3)     | 95.22(9)        |            | 95.1(2)                                 |
| X(4)-Hg(2)-X(3)     | 95.87(4)        | 161.85(8)  | 95.73(9)                                |
| X(3)-Hg(2)-X(2)     |                 | 102.61(7)  |                                         |
| X(2)#1-Hg(2)-X(3)   | 94.63(3)        | 94.04(6)   | 94.58(9)                                |
| Hg(2)#2-X(2)-Hg(1)  | 98.14(3)        |            | 98.04(9)                                |
| Hg(1)-X(3)-Hg(2)    | 96.37(3)        |            | 96.40(9)                                |
| Cl(4)-Hg(2)-Cl(3)#2 |                 | 96.29(6)   |                                         |
| Cl(3)-Hg(2)-Cl(3)#2 |                 | 87.97(6)   |                                         |
| Hg(2)-Cl(2)-Hg(1)#1 |                 | 127.27(7)  |                                         |
| Hg(2)-Cl(2)-Hg(1)   |                 | 117.13(7)  |                                         |
| Hg(1)#1-Cl(2)-Hg(1) |                 | 100.10(6)  |                                         |
| Hg(2)-Cl(3)-Hg(2)#2 |                 | 92.03(6)   |                                         |

**Table S2** Selected bond lengths (Å) and angles (°) for **2** and **3**

| Bond length (Å)/  | <b>2(X=Br)</b> | <b>3(X=I)</b> |
|-------------------|----------------|---------------|
| Hg(1)-N(1)        | 2.253(8)       | 2.303(7)      |
| Hg(1)-X(1)        | 2.4815(11)     | 2.6429(6)     |
| Hg(1)-X(2)        | 2.9325(10)     | 3.0824(6)     |
| Hg(1)-X(3)        | 2.5812(10)     | 2.7406(6)     |
| Hg(2)-N(2)        | 2.246(8)       | 2.285(6)      |
| Hg(2)-X(4)        | 2.4930(10)     | 2.6528(6)     |
| Hg(2)-X(3)        | 2.9063(10)     | 3.0591(6)     |
| Hg(2)-X(2)#1      | 2.5879(10)     | 2.7553(6)     |
| Bond angle (°)    |                |               |
| N(1)-Hg(1)-X(1)   | 129.8(2)       | 127.15(19)    |
| N(1)-Hg(1)-X(3)   | 105.8(2)       | 105.45(19)    |
| X(1)-Hg(1)-X(3)   | 123.40(4)      | 124.82(2)     |
| N(1)-Hg(1)-X(2)   | 91.2(2)        | 92.38(17)     |
| X(1)-Hg(1)-X(2)   | 96.45(3)       | 100.88(2)     |
| X(3)-Hg(1)-X(2)   | 91.70(4)       | 91.442(18)    |
| N(2)-Hg(2)-X(4)   | 129.1(2)       | 126.52(16)    |
| N(2)-Hg(2)-X(2)#1 | 107.7(2)       | 106.31(17)    |
| X(4)-Hg(2)-X(2)#1 | 121.33(4)      | 124.02(2)     |
| N(2)-Hg(2)-X(3)   | 94.64(19)      | 94.97(17)     |
| X(4)-Hg(2)-X(3)   | 95.94(3)       | 99.554(19)    |
| X(2)#1-Hg(2)-X(3) | 92.48(3)       | 92.301(18)    |

|                    |          |            |
|--------------------|----------|------------|
|                    |          |            |
| Hg(2)#2-X(2)-Hg(1) | 95.10(3) | 93.438(18) |
| Hg(1)-X(3)-Hg(2)   | 94.52(3) | 94.742(18) |

**Table S3** Hydrogen bonding parameters (Å, °) for **1**, **4** and **1 (Regenerated)**.

| D-H...A              | <i>d</i> (D...H) | <i>d</i> (D...A) | <i>d</i> (H...A) | ∠D-H...A    |
|----------------------|------------------|------------------|------------------|-------------|
| <b>1</b>             |                  |                  |                  |             |
| O1-H01A...O2(#1)     | 0.840(4)         | 2.665(6)         | 1.879(4)         | 153.14(30)  |
| O2-H02A...O1(#1)     | 0.840(4)         | 2.665(6)         | 1.919(4)         | 145.59(29)  |
| C7-H7A...Cl4(#0)     | 0.990(4)         | 3.672(4)         | 2.768(1)         | 152.10( 26) |
| C14-H14B...Cl1(#2)   | 0.990(4)         | 3.640(4)         | 2.753(1)         | 149.37( 25) |
| C4-H4...Cl1(#3)      | 0.950(5)         | 3.563(5)         | 2.817(1)         | 136.14(28)  |
| C11-H11...Cl4(#4)    | 0.950(4)         | 3.551(4)         | 2.841(1)         | 132.43(26)  |
| C6-H6A...O2(#5)      | 0.990(4)         | 3.708(6)         | 2.724(4)         | 172.23(26)  |
| C13-H13B...O1(#4)    | 0.990(4)         | 3.646(5)         | 2.665(4)         | 170.94(25)  |
| C2-H2...Cl3(#6)      | 0.950(4)         | 3.791(4)         | 2.864(1)         | 165.48(30)  |
| <b>4</b>             |                  |                  |                  |             |
| O1-H101...Cl4 #1     | 0.840(9)         | 2.522(2)         | 3.288(9)         | 152.13(50)  |
| C4-H4...Cl1#2        | 0.950(7)         | 2.964(2)         | 3.584(8)         | 124.08(50)  |
| C4-H4...Cl3#2        | 0.950(7)         | 2.984(2)         | 3.815(8)         | 146.82(54)  |
| C7-H7B...Cl4#3       | 0.990(11)        | 2.825(2)         | 3.738(10)        | 153.53(62)  |
| <b>1 Regenerated</b> |                  |                  |                  |             |
| O1-H01A...O2(#1)     | 0.840(10)        | 2.655(15)        | 2.091(10)        | 124.13(70)  |
| O2-H102...O1(#1)     | 0.840(8)         | 2.655(14)        | 2.183(10)        | 115.5168)   |
| C7-H7A...Cl4(#0)     | 0.990(11)        | 3.684(11)        | 2.772(3)         | 153.33(64)  |
| C14-H14B...Cl1(#2)   | 0.990(11)        | 3.620(11)        | 2.718(3)         | 151.63(68)  |
| C4-H4...Cl1(#3)      | 0.950(14)        | 3.575(16)        | 2.826(3)         | 136.46(89)  |

|                     |           |           |           |            |
|---------------------|-----------|-----------|-----------|------------|
| C11-H11...C14(#4)   | 0.950(9)  | 3.557(10) | 2.849(3)  | 132.19(60) |
| C6-H6A...O2(#5)     | 0.990(10) | 3.733(15) | 2.749(10) | 172.59(65) |
| C13-H13B...O1(#4)   | 0.990(10) | 3.651(13) | 2.670(9)  | 171.12(66) |
| C2-H2...Cl3(3) (#6) | 0.950(11) | 3.800(12) | 2.871(2)  | 165.91(82) |

---

**Symmetry ;**

**For 1 and 1 Regenerated:**

x, y, z (#0)

-x+1,-y,-z(#1)

x+1,+y,+z(#2)

x,+y+1,+z(#3)

x,+y-1,+z(#4)

x-1,+y+1,+z(#5)

-x+1, -y+1, -z+1 (#6)

**For 4:** x+1,+y,+z(#1)

x,+y-1,+z(#2)

-x+1,-y+1,-z+2(#3)

**Short contacts for 1**

2.6551 (50) O1 - O2\_\$2

2.7021 (82) O1 - O1\_\$1

2.6551 (50) O2 - O1\_\$2

2.7026 (75) O2 - O2\_\$3

**Short contacts for 1 Regenerated**

2.6547 (123) O1 - O2\_\$2

2.6841 (189) O1 - O1\_\$1

2.6547 (124) O2 - O1\_\$2

2.6869 (197) O2 - O2\_\$3

Symmetry:

\$1 -X, -Y+1, -Z

\$2 -X+1, -Y, -Z

\$3 -X+1, -Y-1, -Z

**Table S4** Hydrogen bonding parameters (Å, °) for **2** and **3**

| D-H...A            | <i>d</i> (D...H) | <i>d</i> (D...A) | <i>d</i> (H...A) | ∠D-H...A    |
|--------------------|------------------|------------------|------------------|-------------|
| <b>2</b>           |                  |                  |                  |             |
| O1-H01A...O2(#1)   | 0.840(9)         | 2.701(13)        | 1.968(9)         | 145.31(63)  |
| O2-H02A...O1(#1)   | 0.840(4)         | 2.701(13)        | 1.964(9)         | 146.06(65)  |
| C7-H7A...Br4(#0)   | 0.990(10)        | 3.777(10)        | 2.871(1)         | 152.59(60)  |
| C14-H14B...Br1(#2) | 0.990(9)         | 3.726(9)         | 2.832(1)         | 150.54( 56) |
| C4-H4...Br1(#3)    | 0.950(13)        | 3.752(12)        | 2.980(1)         | 139.32(71)  |
| C11-H11...Br4(#4)  | 0.950(9)         | 3.719(10)        | 2.986(1)         | 134.95(62)  |
| C6-H6A...O2(#5)    | 0.990(10)        | 3.791(13)        | 2.804(9)         | 173.19(61)  |
| C13-H13B...O1(#4)  | 0.990(4)         | 3.689(12)        | 2.704(8)         | 173.14(58)  |
| <b>3</b>           |                  |                  |                  |             |
| O1-H01A...O2(#1)   | 0.840(7)         | 2.718(10)        | 2.018(7)         | 140.43(51)  |
| O2-H02B...O1(#1)   | 0.840(7)         | 2.718(10)        | 1.954(7)         | 150.86(52)  |
| C7-H7A...I4 (#0)   | 0.990(4)         | 3.672(4)         | 2.769(1)         | 151.89( 26) |
| C14-H14B...I1(#2)  | 0.990(4)         | 3.640(4)         | 2.754(1)         | 149.22( 25) |
| C4-H4...I1(#3)     | 0.950(5)         | 3.563(5)         | 2.817(1)         | 136.14(28)  |
| C11-H11...I4(#4)   | 0.950(4)         | 3.551(4)         | 2.840(1)         | 132.43(26)  |
| C6-H6A...O2(#5)    | 0.990(9)         | 3.938(11)        | 2.954(7)         | 172.35(51)  |
| C13-H13B...O1(#4)  | 0.990(7)         | 3.843(10)        | 2.861(6)         | 171.20(48)  |

---

**Symmetry ;**For **2-3**:



$x, y, z$  (#0)

$-x+1, -y, -z$  (#1)

$x+1, +y, +z$  (#2)

$x, +y+1, +z$  (#3)

$x, +y-1, +z$  (#4)

$x-1, +y+1, +z$  (#5)

Short contacts for **2**

3.6622 (15) Br3...Br3\_\$4

2.7015 (109) O1 - O2\_\$2

2.7252 (159) O1 - O1\_\$1

2.7015 (109) O2 - O1\_\$2

2.7138 (180) O2 - O2\_\$3

Short contacts for **3**

3.8156 (7) I3...I3\_\$4

2.7185 (95) O1 - O2\_\$2

2.7415 (132) O1 - O1\_\$1

2.7185 (95) O2 - O1\_\$2

2.7236 (138) O2 - O2\_\$3

Symmetry:

\$1  $-X, -Y+1, -Z$

\$2  $-X+1, -Y, -Z$

\$3  $-X+1, -Y-1, -Z$

\$4  $-x+1, -y, -z+1$

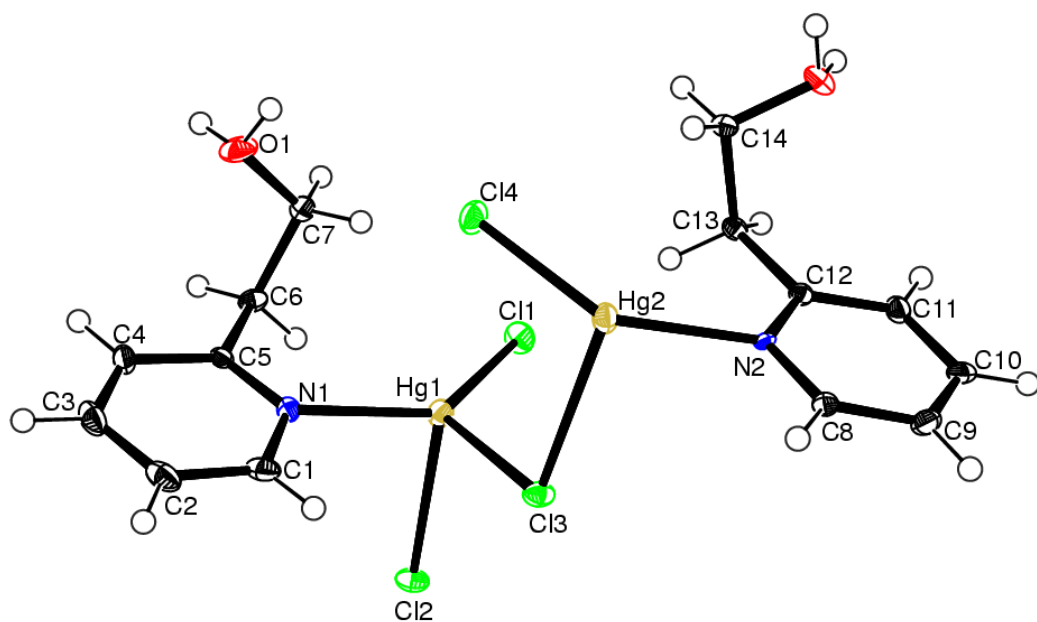

**Fig. S1** ORTEP drawing of **1** showing the molecule in the asymmetric unit with anisotropic displacement parameters are drawn at 50% probability.

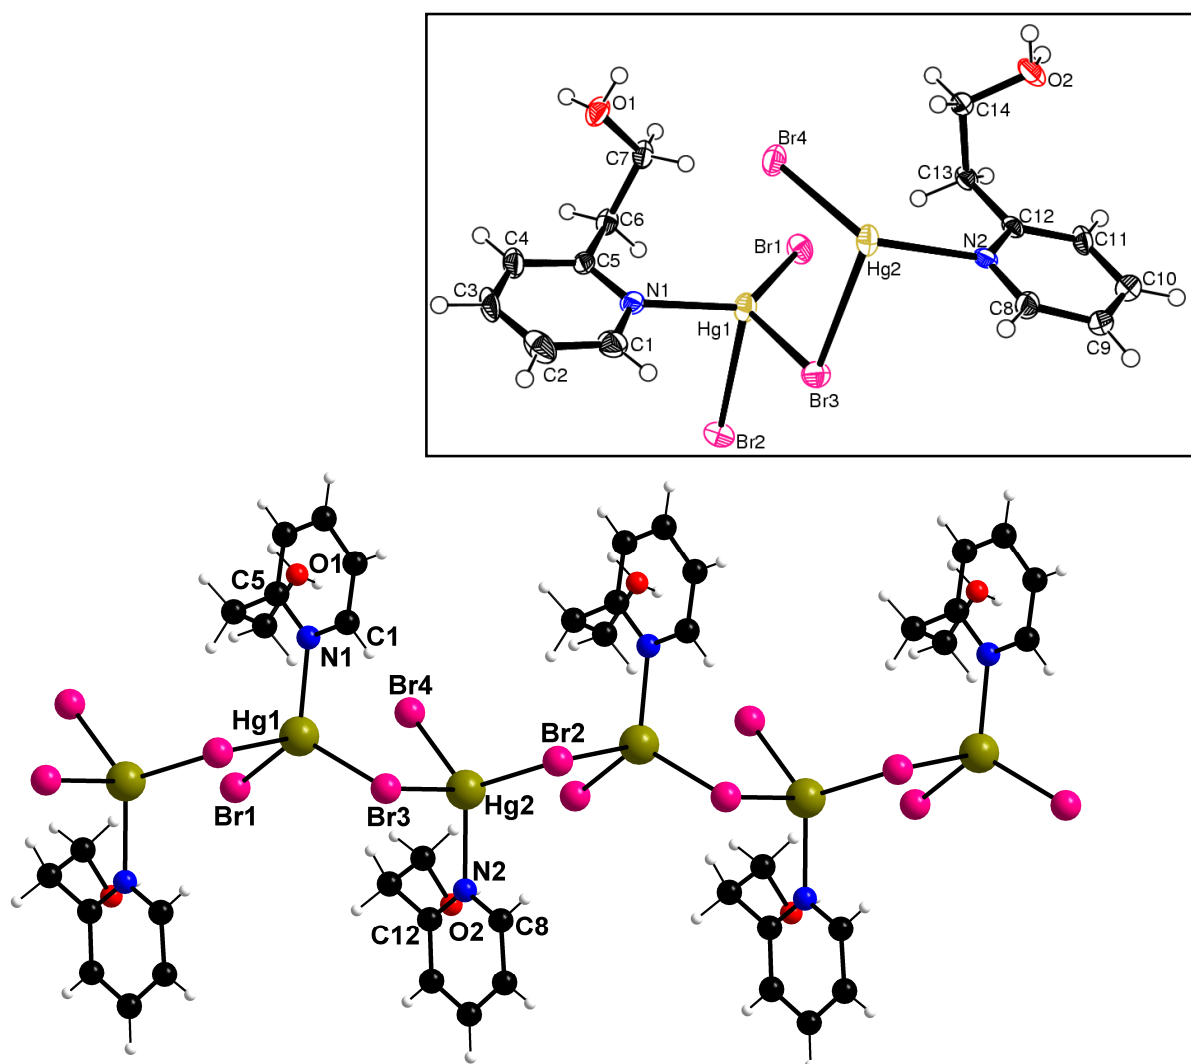

**Fig. S2** Perspective view of the 1D-coordination polymeric chain in **2**. Insert shows the ORTEP drawing of **2** showing the molecule in the asymmetric unit with anisotropic displacement parameters are drawn at 50% probability.

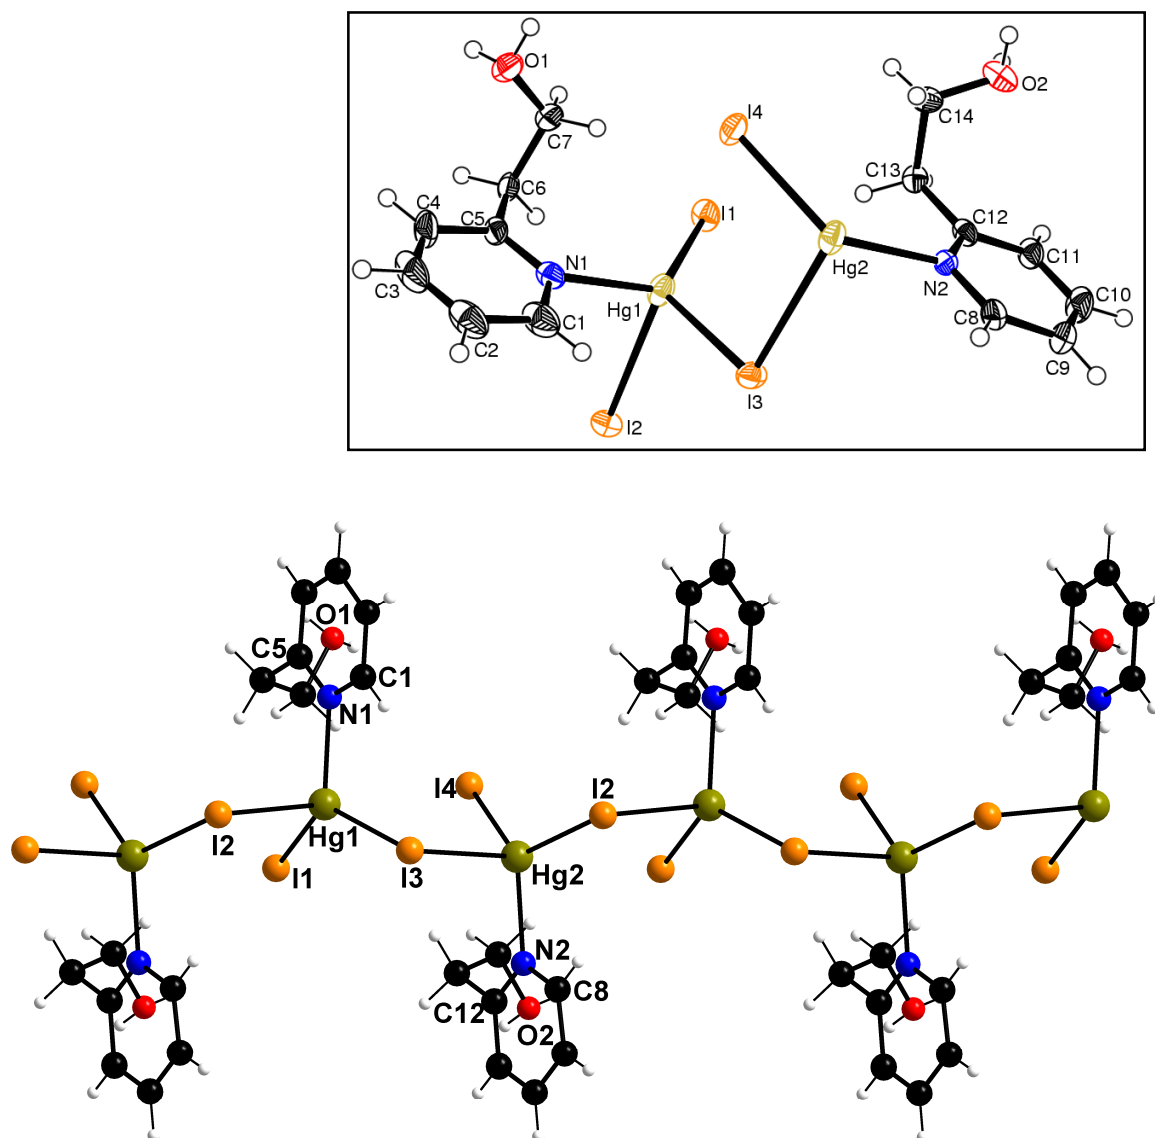

**Fig. S3** Perspective view of the 1D-coordination polymeric chain in **3**. Insert shows the ORTEP drawing of **3** showing the molecule in the asymmetric unit with anisotropic displacement parameters are drawn at 50% probability.

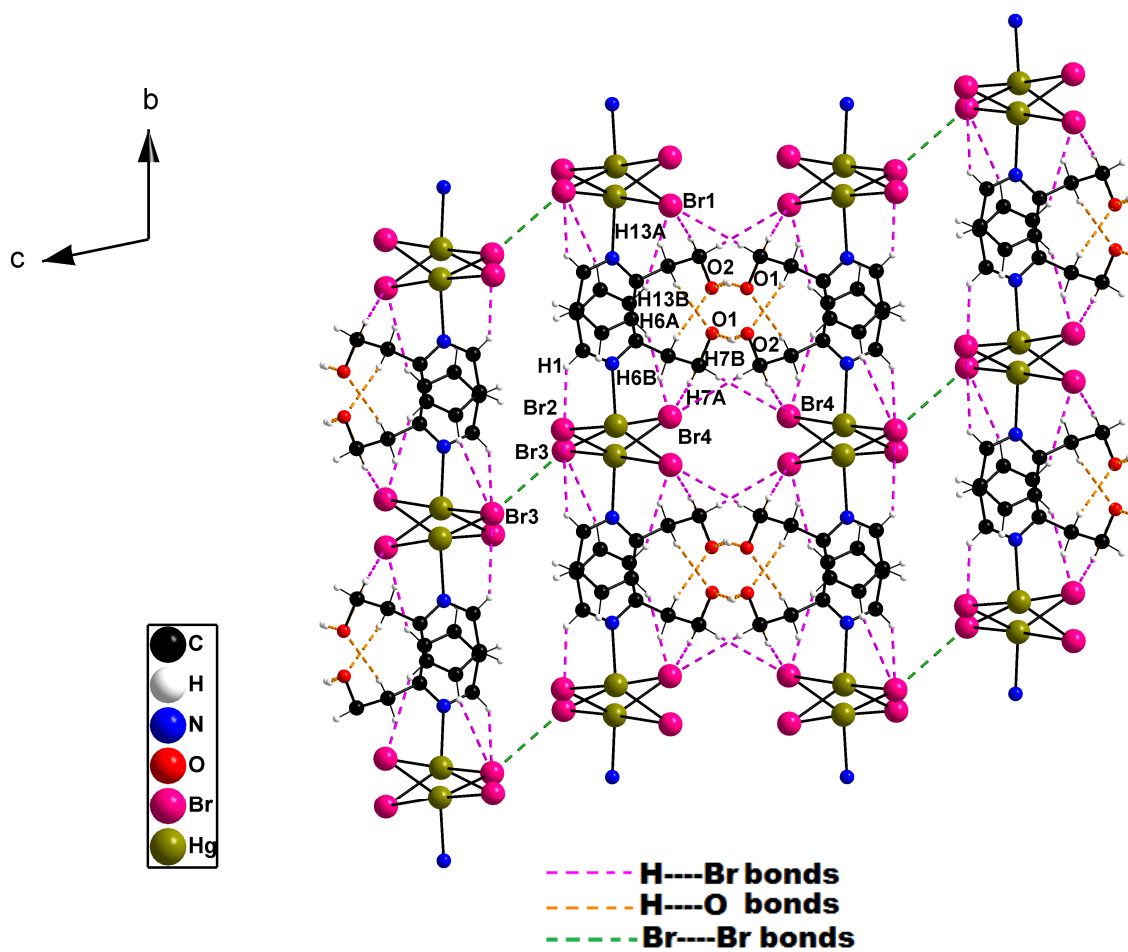

**Fig. S4** Packing diagram of the hydrogen bonded 2D network in **2** along the *a*-axis.

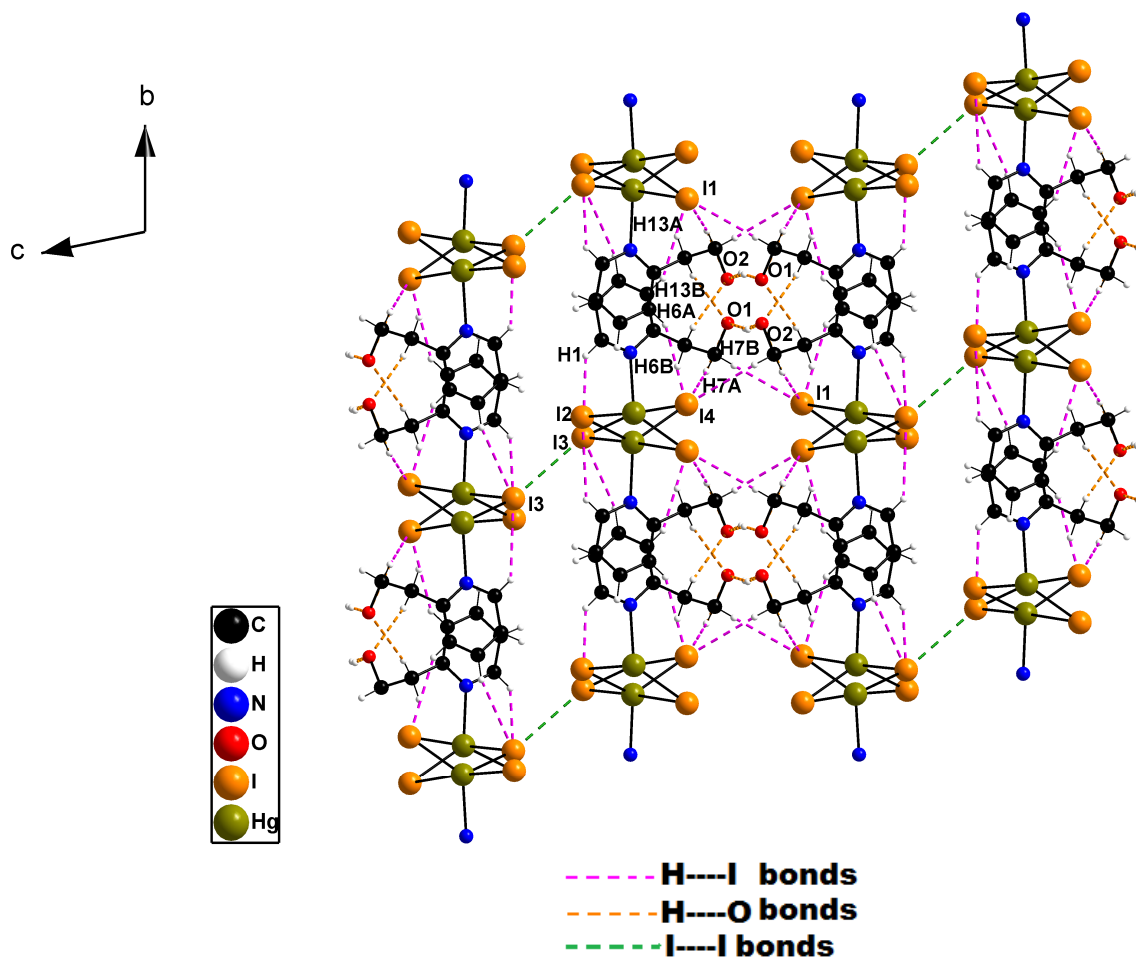

Fig. S5 Packing diagram of the hydrogen bonded 2D network in **3** along the *a*-axis.

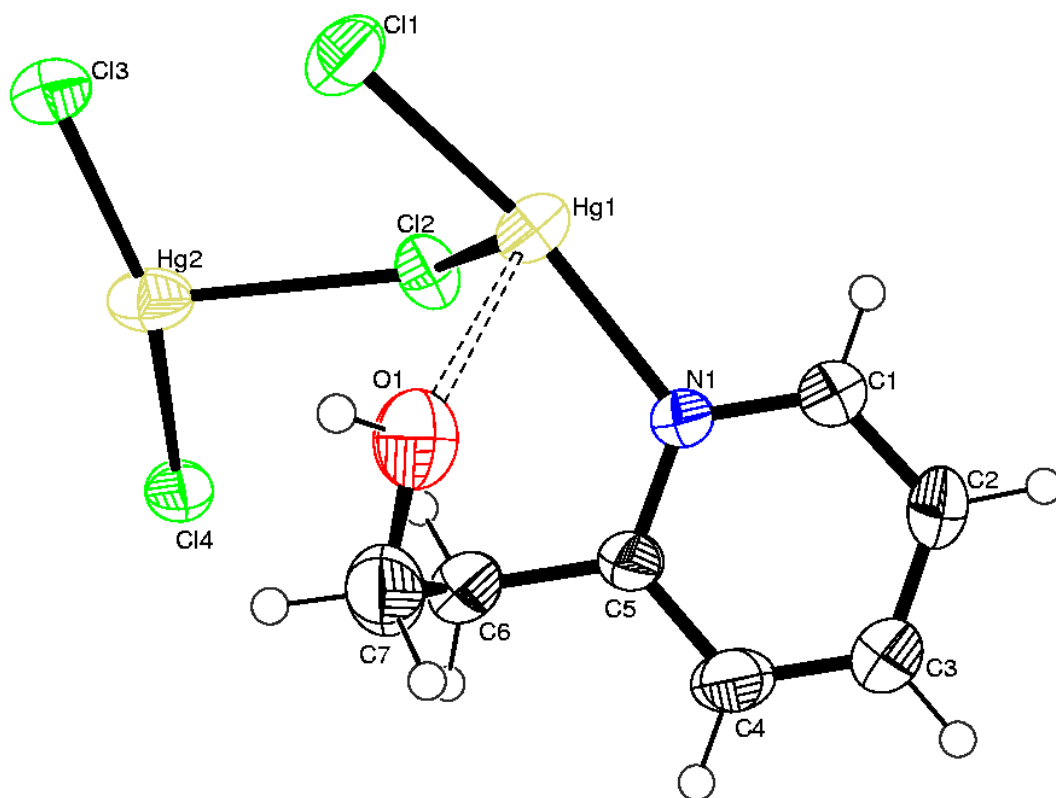

**Fig. S6** ORTEP drawing of **4** showing the molecule in the asymmetric unit with anisotropic displacement parameters are drawn at 50% probability.

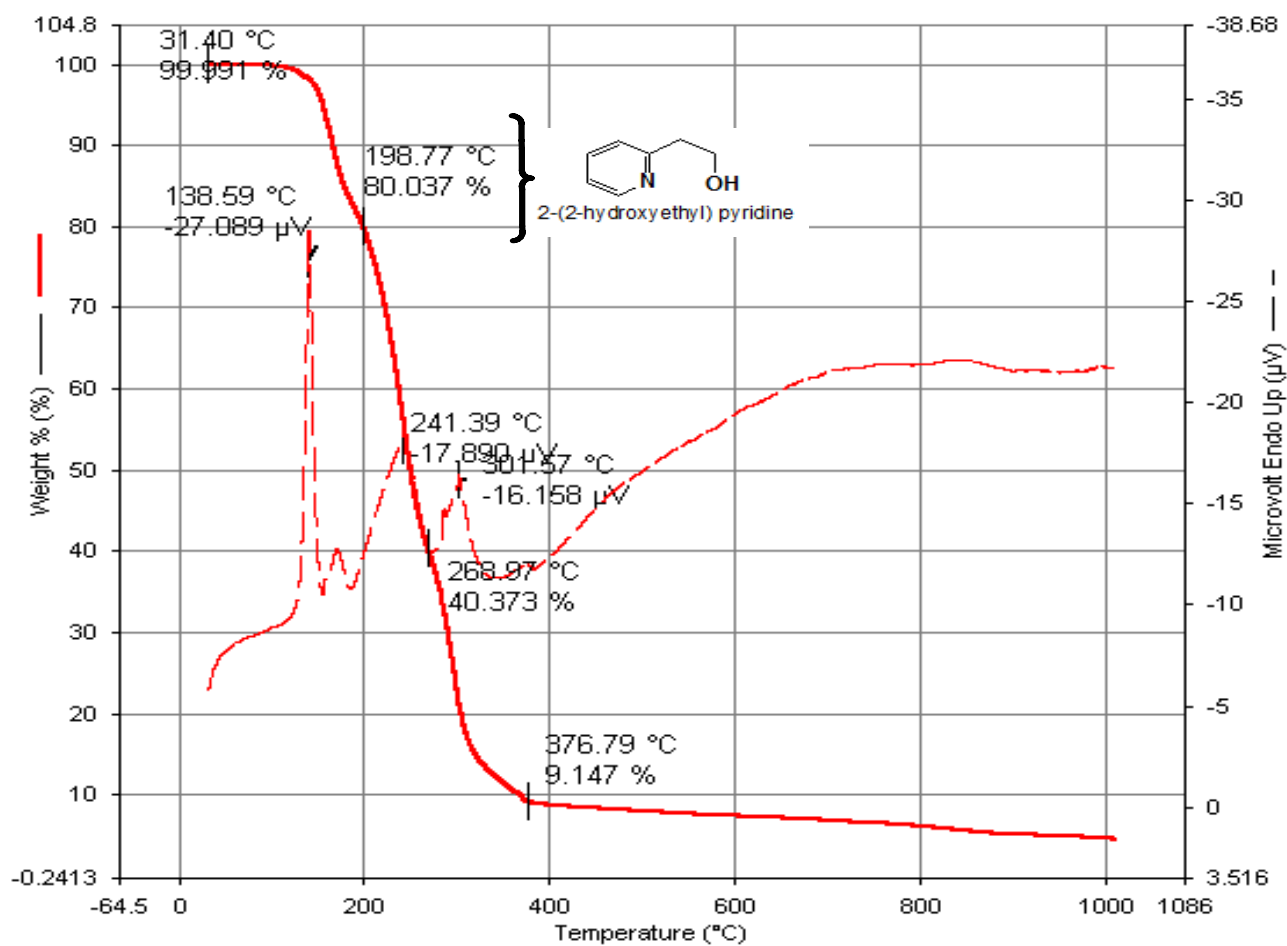

**Fig. S7** TGA of **1**, revealing initial 18% loss corresponds to the removal of hep-H ligand.



(a)

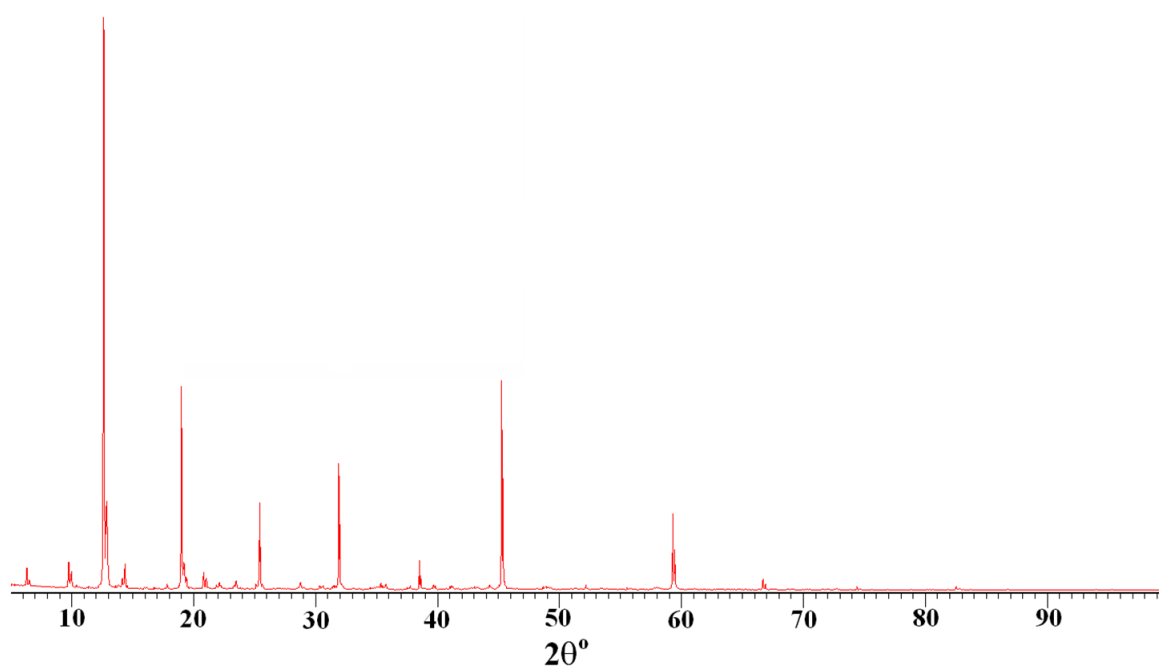

(b)

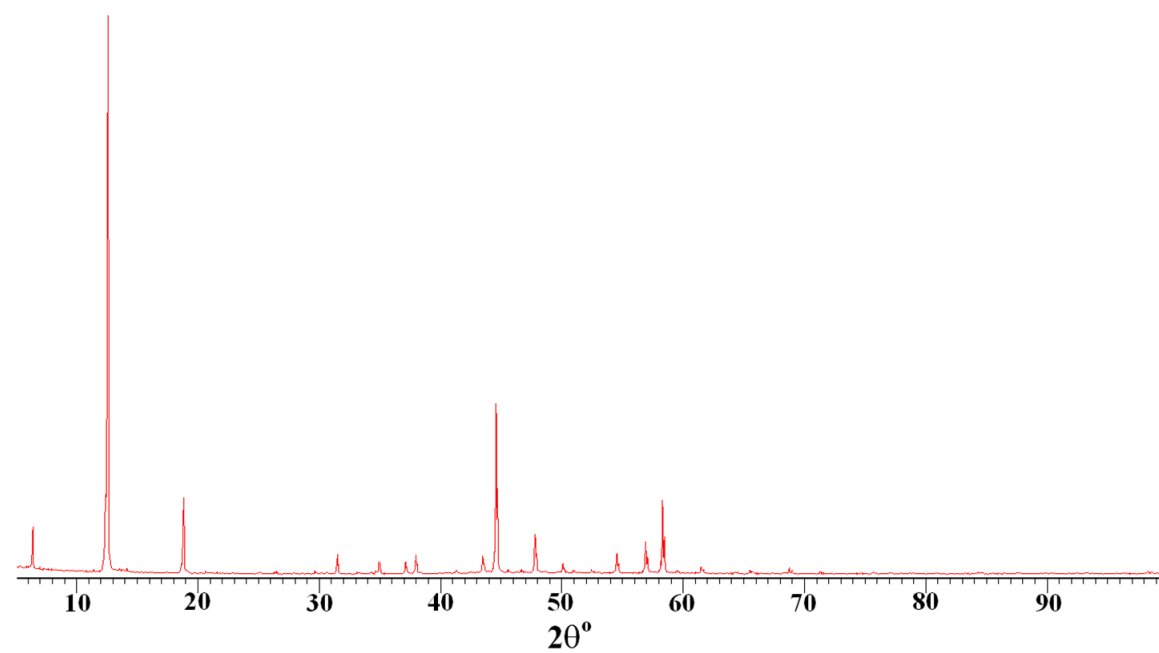

**Fig. S8** Powder XRD patterns for (a) **1** and (b) **2**.

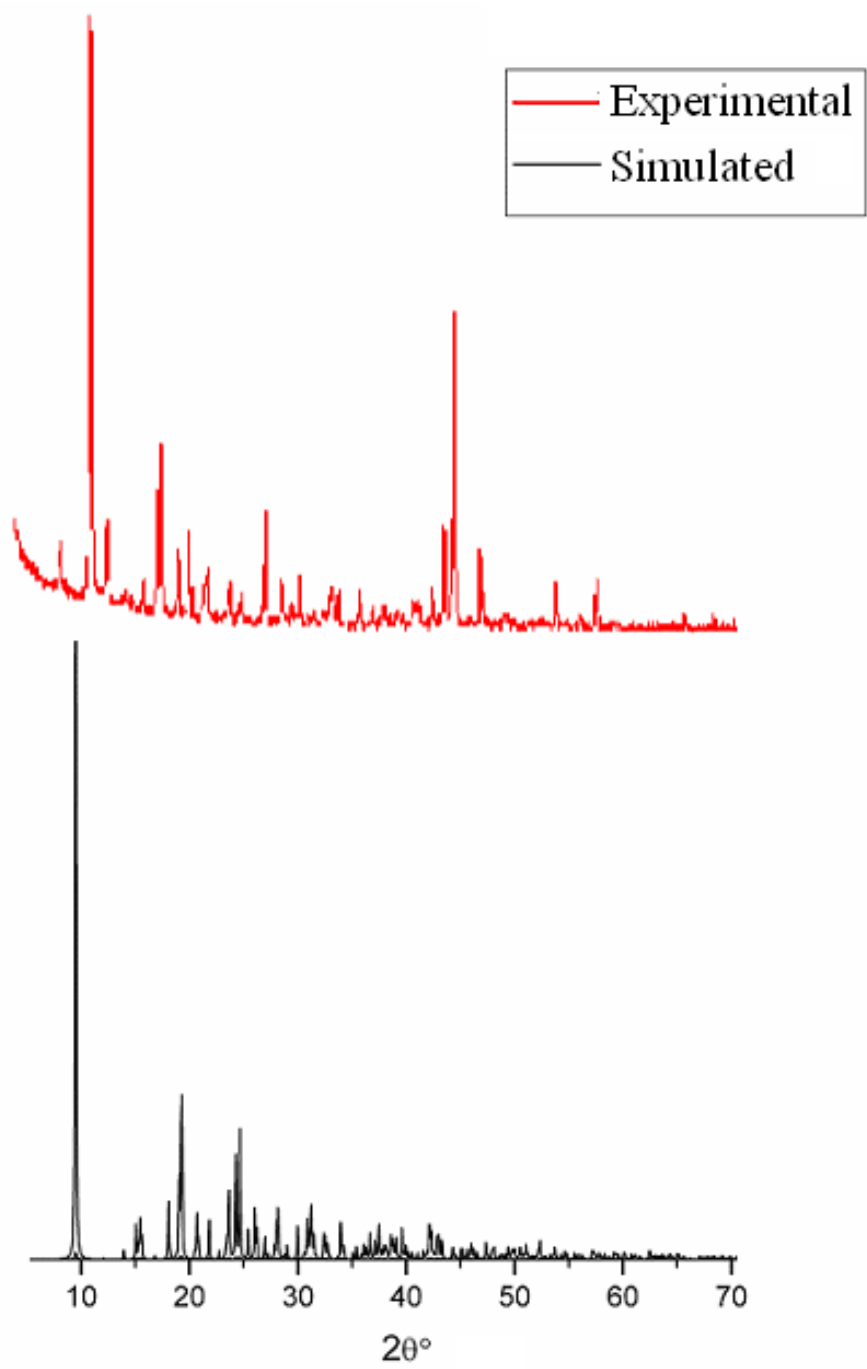

**Fig. 9** Powder XRD patterns for 4 simulated (black) and experimental (red).

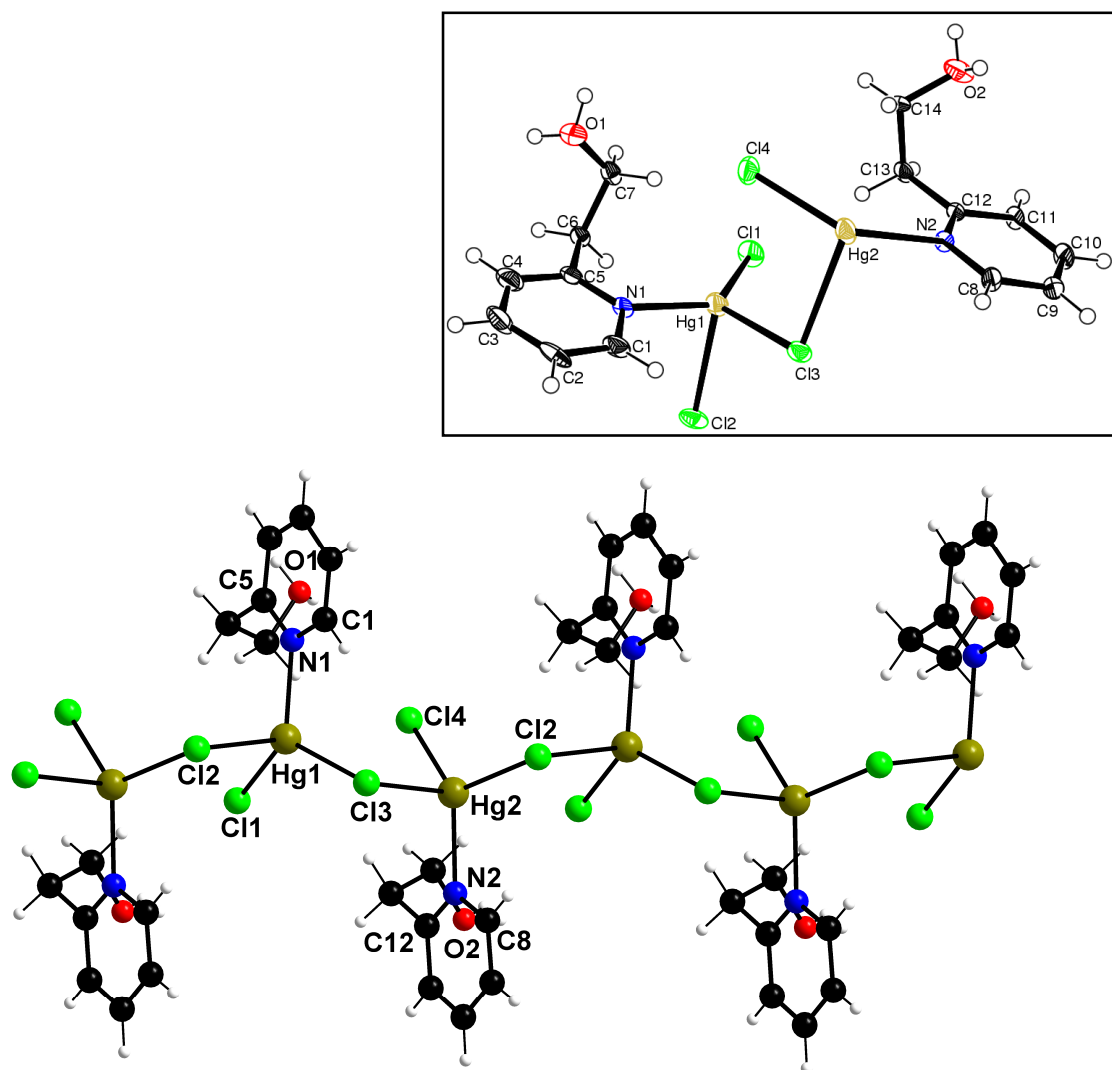

**Fig. S10** Perspective view of the 1D-coordination polymeric chain in **1-Regenerated**. Insert shows the ORTEP drawing of **1-Regenerated** showing the molecule in the asymmetric unit with anisotropic displacement parameters are drawn at 50% probability.

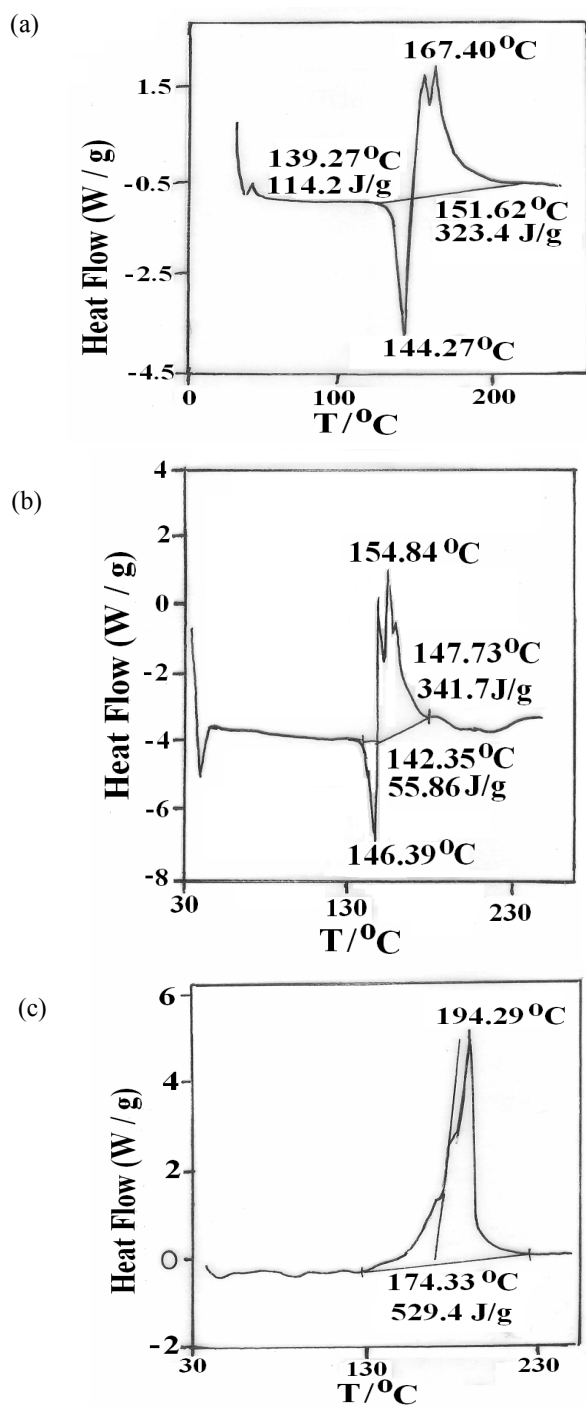

**Fig. S11** DSC: (a) 1, (b) 2 and (c) 4.
